# Supplementary material
Source: publisher figshare collection journal article supplement (https://gsajournals.figshare.com/ndownloader/files/28076187)
Supplement: Supplementary file 1 [file 28076187]

## Sheet: Suppressors
	Table S2: Gene ontology enrichment analysis of suppressors and enhancers of fzo-1(tm1133)-induced UPRmt
		Biological Process
		Cellular Component
		Molecular Function
Category	ID	Term	Count	%	PValue	Genes	List Total	Pop Hits	Pop Total	Fold Enrichment	Bonferroni	Benjamini	FDR
GOTERM_BP_DIRECT	GO:0002119	nematode larval development	226	75.5853	3.22878e-122	SWD-2.2, PYP-1, C16A3.6, GEI-4, SNR-6, DYN-1, TEG-4, T07A9.14, F10E9.4, RSR-2, B0238.11, CDGS-1, NARS-1, TBP-1, VPS-37, KIN-10, RAN-1, IARS-1, W04A4.5, SYX-18, F58B3.4, D2085.3, W01D2.1, F33H1.4, UBC-9, UNC-54, CAP-1, CAP-2, RPL-24.1, BYN-1, EIF-6, SRPA-68, RARS-1, LPD-7, C06E4.6, HPO-31, ZK795.3, MUA-6, RHA-2, H35B03.2, C03D6.1, INF-1, F54D5.11, RNP-4, VPS-20, Y39A1A.14, GARS-1, SNR-3, RPL-18, R…	282	1993	11627	4.67541	1.47233e-119	1.47233e-119	4.58934e-119
GOTERM_BP_DIRECT	GO:0000003	reproduction	221	73.913	4.69542e-106	SWD-2.2, PYP-1, RPA-2, C16A3.6, GEI-4, SNR-6, DYN-1, TEG-4, T07A9.14, F10E9.4, RSR-2, B0238.11, CDGS-1, NARS-1, VPS-37, KIN-10, RAN-1, EIF-1.A, IARS-1, W04A4.5, SYX-18, F58B3.4, D2085.3, W01D2.1, F33H1.4, UBC-9, CAP-1, CAP-2, RPL-24.1, BYN-1, EIF-6, SRPA-68, LPD-7, RARS-1, C06E4.6, ZK795.3, RHA-2, H35B03.2, C03D6.1, INF-1, SPD-5, C23G10.8, F54D5.11, RNP-4, Y39A1A.14, GARS-1, SNR-3, RPL-18, RPL-19…	282	2205	11627	4.1324	2.14111e-103	1.07055e-103	6.67398e-103
GOTERM_BP_DIRECT	GO:0009792	embryo development ending in birth or egg hatching	229	76.5886	1.81705e-83	SWD-2.2, PYP-1, RPA-2, C16A3.6, GEI-4, SNR-6, DYN-1, TEG-4, F10E9.4, RSR-2, NARS-1, TBP-1, VPS-37, KIN-10, RAN-1, EIF-1.A, IARS-1, W04A4.5, D2085.3, W01D2.1, DIP-2, F33H1.4, UBC-9, CAP-1, CAP-2, RPL-24.1, BYN-1, EIF-6, SRPA-68, Y47D3A.29, RARS-1, LPD-7, ZK795.3, RHA-2, F10B5.8, C03D6.1, INF-1, SPD-5, C23G10.8, F54D5.11, F10E9.7, RNP-4, Y39A1A.14, GARS-1, SNR-3, RPL-18, RPL-19, RPL-14, RPL-12, E02…	282	3091	11627	3.0546	8.28577e-81	2.76192e-81	2.58273e-80
GOTERM_BP_DIRECT	GO:0006898	receptor-mediated endocytosis	101	33.7793	5.50269e-50	Y39B6A.36, F23F1.5, C53H9.2, C16A3.6, DBR-1, GEI-4, DYN-1, F10E9.4, CRN-3, B0238.11, DYCI-1, TAF-5, TBP-1, VPS-37, F43G9.12, EIF-1.A, IARS-1, F58B3.4, PRO-3, RPAC-40, GBF-1, ERFA-3, TAF-1, C18A3.3, W07E6.2, Y62E10A.2, EIF-6, BYN-1, Y51H4A.15, SRPA-68, RPS-18, ZK795.3, HPO-31, SFA-1, MUA-6, PFD-6, SMGL-1, RHA-2, H35B03.2, ZK550.4, EIF-3.B, EIF-3.E, GOP-2, MDT-26, C03D6.1, Y48G1A.4, R186.3, F54D5.1…	282	733	11627	5.68115	2.50923e-47	6.27307e-48	7.82142e-47
GOTERM_BP_DIRECT	GO:0006412	translation	64	21.4047	3.88507e-46	RPL-18, RPL-19, RPL-14, RPL-12, T07A9.14, RPS-30, NARS-1, F11A3.2, EEF-1G, RPL-22, RPL-21, RPL-20, C16C10.2, RPL-11.1, RPL-27, EIF-1.A, IARS-1, RPL-23, RPL-26, W01D2.1, TARS-1, IFFB-1, FARS-1, RPL-24.1, RPL-31, RPS-7, RPS-6, RPL-30, RPS-5, EIF-6, RPS-4, RPS-3, RPS-0, RPS-11, RPS-8, RPS-9, RPL-25.1, RPL-35, RPS-14, RPS-15, RPS-16, RARS-1, RPS-18, RPL-36.A, IFTB-1, RPL-7A, QARS-1, RPL-43, EIF-3.B, …	282	260	11627	10.149	1.77159e-43	3.54318e-44	5.52216e-43
GOTERM_CC_DIRECT	GO:0030529	intracellular ribonucleoprotein complex	48	16.0535	3.81346e-43	RPL-18, RPS-8, RPS-11, RPS-9, RPL-19, RPL-25.1, RPL-35, RPS-14, RPS-15, TOE-1, RPS-16, SNR-6, RPL-12, RPS-18, RPL-36.A, RPL-7A, CGH-1, RPL-22, RPL-21, FIB-1, RPL-20, RPL-11.1, RPL-43, RPL-27, RPS-25, RPS-22, RPS-23, RPS-28, RPL-23, RPL-6, RPS-27, UBL-1, RPL-26, RPL-9, RPL-7, W01D2.1, RPS-21, RPS-7, RPL-24.1, RPL-31, RPS-6, RPS-5, RPS-19, RPS-4, RPS-3, SRPA-68, SNR-3, RPS-0	246	146	11373	15.1995	7.1693e-41	7.1693e-41	4.73131e-40
GOTERM_CC_DIRECT	GO:0005840	ribosome	47	15.7191	5.97444e-40	RPL-18, RPS-11, RPS-8, RPS-9, RPL-19, RPL-25.1, RPL-35, RPS-14, RPS-15, RPL-14, RPS-16, RPL-12, RPS-18, T07A9.14, RPS-30, RPL-36.A, RPS-10, RPL-7A, RPL-22, RPL-21, RPL-20, RPL-11.1, RPL-43, RPL-27, RPS-25, RPS-22, RPS-23, RPS-28, RPL-23, RPL-6, RPS-27, RPL-26, UBL-1, RPL-9, RPL-7, W01D2.1, RPS-21, RPS-7, RPL-24.1, RPL-31, RPS-6, RPL-30, RPS-5, RPS-19, RPS-4, RPS-3, RPS-0	246	158	11373	13.7525	1.12319e-37	5.61597e-38	7.41242e-37
GOTERM_MF_DIRECT	GO:0003735	structural constituent of ribosome	45	15.0502	6.75426e-33	RPL-18, RPS-8, RPS-11, RPS-9, RPL-19, RPL-25.1, RPL-35, RPS-14, RPS-15, RPL-14, RPS-16, RPL-12, RPS-18, T07A9.14, RPS-30, RPL-36.A, RPS-10, RPL-22, RPL-21, RPL-20, RPL-11.1, RPL-43, RPL-27, RPS-22, RPS-23, RPS-28, RPL-23, RPL-6, RPS-27, RPL-26, UBL-1, RPL-9, RPL-7, W01D2.1, RPS-21, RPS-7, RPL-24.1, RPL-31, RPS-6, RPL-30, RPS-5, RPS-19, RPS-4, RPS-3, RPS-0	228	179	9479	10.4517	1.43866e-30	1.43866e-30	8.55301e-30
GOTERM_BP_DIRECT	GO:0040035	hermaphrodite genitalia development	82	27.4247	1.07086e-32	SWD-2.2, RPA-2, C53H9.2, C16A3.6, HSF-1, Y50D7A.11, GEI-4, TEG-4, E02H1.1, K07C5.4, XPO-2, F53H1.1, B0238.11, RSR-2, F11A3.2, VPS-37, KIN-10, CGH-1, Y65B4A.6, RPL-11.1, CCT-2, F43G9.12, RUVB-1, LET-418, K12H4.3, IFB-1, W04A4.5, HIS-61, D2085.3, NATH-10, ICD-1, TAF-1, C18A3.3, Y23H5B.5, DCN-1, UBC-9, CAP-2, RPL-31, BYN-1, RAE-1, NPP-2, SRPA-68, CLPP-1, RPS-0, F28F8.5, RPL-25.1, RPC-25, T23D8.3, LP…	282	738	11627	4.58117	4.88313e-30	8.13855e-31	1.5221e-29
GOTERM_BP_DIRECT	GO:0006915	apoptotic process	67	22.408	2.90664e-32	RPL-18, RPL-19, SNR-6, DYN-1, RPL-12, NARS-1, CGH-1, RPL-21, RPL-20, RAN-1, CCT-2, F43G9.12, W04A4.5, HIS-61, RPL-26, GBF-1, C32D5.3, C53A5.6, ERFA-3, T27F7.4, UBC-9, CAP-1, LPIN-1, RPL-31, RPS-7, RPS-6, RPS-5, RPS-3, RPS-0, CLPP-1, RPS-11, RPS-8, RPS-9, RPL-35, RPS-15, RPS-16, AGEF-1, LPD-7, RBX-1, PPK-1, IFTB-1, RPS-10, NSF-1, T26G10.1, TFG-1, F21D5.1, IMB-3, EIF-3.B, EIF-3.E, RPS-23, RPS-28, R…	282	479	11627	5.7671	1.32543e-29	1.89347e-30	4.13144e-29
GOTERM_BP_DIRECT	GO:0040011	locomotion	99	33.1104	5.03402e-24	RPA-2, F23F1.5, DBR-1, SNR-6, DYN-1, CDK-9, CDGS-1, TAF-4, VPS-37, KIN-10, NOG-1, RAN-1, F43G9.12, EIF-1.A, W04A4.5, SYX-18, GBF-1, ERFA-3, TAF-1, F33H1.4, UNC-54, UBC-9, UFD-1, TAF-10, RBX-1, PPK-1, MUA-6, SFA-1, PFD-6, RPS-10, SMGL-1, KIN-2, Y39G10AR.8, ZK550.4, EIF-3.B, MDT-26, INF-1, MDT-10, F54D5.11, DPY-30, VPS-4, PABP-2, Y51A2D.7, RNP-4, VPS-20, APM-1, RPS-19, AARS-2, MDT-18, MDT-17, HSF-1…	282	1405	11627	2.90521	2.29551e-21	2.86939e-22	7.15526e-21
GOTERM_MF_DIRECT	GO:0003723	RNA binding	46	15.3846	2.75766e-23	RPL-18, RPS-9, F23F1.5, NOL-1, RPL-25.1, RPS-15, SNR-6, RPL-12, TEG-4, RPS-18, E02H1.1, LPD-7, HPO-31, SFA-1, RPL-7A, RHA-2, H35B03.2, T26G10.1, PUF-12, EXOS-3, EXOS-2, CGH-1, FIB-1, QARS-1, GUT-2, EIF-3.B, K12H4.3, EIF-1.A, CACN-1, RPS-28, INF-1, RPL-9, RPL-7, W01D2.1, TARS-1, B0511.6, RNP-4, Y39A1A.14, LET-716, RPL-30, RAE-1, RPS-4, RPS-3, AARS-2, SRPA-68, SNR-3	228	311	9479	6.14929	5.87381e-21	2.9369e-21	3.49206e-20
GOTERM_CC_DIRECT	GO:0022627	cytosolic small ribosomal subunit	20	6.68896	6.51386e-23	RPS-11, RPS-8, RPS-9, RPS-23, RPS-14, RPS-28, RPS-15, RPS-16, RPS-27, T07A9.14, RPS-30, RPS-21, RPS-10, RPS-7, RPS-6, RPS-5, RPS-4, RPS-19, RPS-3, RPS-0	246	36	11373	25.6843	1.22461e-20	4.08202e-21	8.08168e-20
GOTERM_CC_DIRECT	GO:0022625	cytosolic large ribosomal subunit	22	7.35786	1.13319e-21	RPL-27, RPL-18, RPL-19, RPL-25.1, RPL-35, RPL-23, RPL-14, RPL-6, RPL-12, RPL-26, RPL-9, W01D2.1, RPL-7, RPL-36.A, RPL-7A, RPL-31, RPL-24.1, RPL-22, RPL-21, RPL-30, RPL-20, RPL-11.1	246	54	11373	18.8351	2.13039e-19	5.32597e-20	1.40593e-18
GOTERM_CC_DIRECT	GO:0005730	nucleolus	27	9.0301	1.29598e-20	NOL-1, C16A3.6, TOE-1, LPD-7, E02H1.1, RHA-2, PUF-12, F30A10.9, T01B7.5, FIB-1, C16C10.2, NOG-1, K12H4.3, UTP-20, XRN-2, Y48G1A.4, PRO-3, NATH-10, WDR-46, C18A3.3, Y23H5B.5, T20B12.3, W07E6.2, LET-716, Y39A1A.14, TAG-151, EIF-6	246	107	11373	11.6659	2.43644e-18	4.87287e-19	1.6079e-17
GOTERM_BP_DIRECT	GO:0018996	molting cycle, collagen and cuticulin-based cuticle	42	14.0468	6.63967e-20	RPL-18, F28F8.5, RPS-11, RPS-14, RPL-14, RPS-16, SNR-6, DYN-1, RPL-36.A, MUA-6, RPS-10, SMGL-1, KIN-2, VPS-37, TFG-1, HMGS-1, Y65B4A.6, IMB-3, F43G9.12, RPL-27, RPS-22, IFB-1, XRN-2, RPS-23, CACN-1, RPS-28, RPL-23, STC-1, UBL-1, CEL-1, VPS-4, MLT-8, RPS-21, F38A1.8, RPL-31, F55A3.3, RPS-6, POD-2, RPS-19, RPS-3, RPS-0, CLPP-1	282	300	11627	5.77227	3.02769e-17	3.3641e-18	9.4375e-17
GOTERM_BP_DIRECT	GO:0008406	gonad development	44	14.7157	2.7582e-19	UFD-1, RPS-8, RPL-19, HSF-1, RPC-25, GEI-4, T23D8.3, TEG-4, LAM-2, LIN-9, F10E9.4, RBX-1, SFA-1, DYCI-1, F30A10.9, LET-611, T01B7.5, RPL-21, FIB-1, CUL-1, NOG-1, RPAC-19, GUT-2, Y53F4B.13, EIF-1.A, XRN-2, CACN-1, RPS-28, NATH-10, ICD-1, C23G10.8, GBF-1, RPS-21, WDR-46, DPL-1, C53A5.6, T20B12.3, T27F7.4, LET-716, RPC-2, RPC-1, EMB-27, BYN-1, Y51H4A.15	282	345	11627	5.25838	1.25774e-16	1.25774e-17	3.92046e-16
GOTERM_CC_DIRECT	GO:0032040	small-subunit processome	15	5.01672	1.77298e-15	UTP-20, TOE-1, Y48G1A.4, K07C5.4, ZK795.3, WDR-46, F13H8.2, T20B12.3, F30A10.9, T01B7.5, RPS-7, LET-716, Y39A1A.14, C16C10.2, FIB-1	246	33	11373	21.0144	3.33955e-13	5.56222e-14	2.20934e-12
GOTERM_BP_DIRECT	GO:0000462	maturation of SSU-rRNA from tricistronic rRNA transcript (SSU-rRNA, 5.8S rRNA, LSU-rRNA)	14	4.68227	6.04529e-14	UTP-20, RPS-8, F13H8.2, T20B12.3, RPS-14, TOE-1, RPS-16, F30A10.9, T01B7.5, T07A9.14, Y39A1A.14, TAG-151, Y51H4A.15, WDR-46	282	30	11627	19.2409	2.75913e-11	2.50833e-12	8.6009e-11
GOTERM_CC_DIRECT	GO:0005634	nucleus	89	29.7659	1.15779e-13	RPA-2, Y39B6A.36, F23F1.5, HSF-1, DBR-1, SNR-6, TEG-4, E02H1.1, ESS-2, RPT-3, RPN-13, CDK-9, Y54H5A.1, SET-4, TAF-5, TAF-4, TBP-1, EEF-1G, KIN-10, LIN-15B, C16C10.2, FIB-1, RPAC-19, NOG-1, RAN-1, F43G9.12, RUVB-1, LET-418, K12H4.3, Y53F4B.13, XRN-2, F58B3.4, HIS-61, NATH-10, ICD-1, PRO-3, HIS-63, HTAS-1, C47E12.7, TAF-1, C18A3.3, DCN-1, UBC-9, W07E6.2, Y62E10A.2, TAG-151, EIF-6, RAE-1, Y51H4A.15,…	246	1888	11373	2.17935	2.17697e-11	3.10996e-12	1.43663e-10
GOTERM_BP_DIRECT	GO:0010171	body morphogenesis	48	16.0535	1.40663e-12	RPS-9, TAF-10, LAM-2, LIN-9, SFA-1, MUA-6, PFD-6, IFTB-1, KIN-2, T26G10.1, LET-611, Y39G10AR.8, TFG-1, HMGS-1, KIN-10, ZK550.4, IMB-2, EIF-3.B, RUVB-1, MDT-26, W04A4.5, IFB-1, C03D6.1, D2085.3, UBL-1, Y47H9C.7, MDT-30, RPL-9, F54D5.11, ICD-1, CEL-1, DPY-30, MLT-8, EKL-7, TAF-1, COGC-4, T27F7.4, MDT-8, UNC-54, CAP-2, THOC-2, FARS-1, VPS-20, UNC-32, NPP-20, MDT-18, CLPP-1, MDT-17	282	616	11627	3.21277	6.41434e-10	5.34528e-11	1.99939e-09
GOTERM_CC_DIRECT	GO:0005622	intracellular	35	11.7057	3.1632e-12	RPL-18, RPS-8, RPS-11, RPS-9, RPL-19, RPL-25.1, RPL-35, RPL-14, RPS-18, T07A9.14, RPS-30, RPL-36.A, CRN-3, Y39G10AR.8, RPL-22, RPL-21, IMB-2, RPL-43, CLP-7, RPL-27, RPS-23, RPS-28, RPL-6, RPS-27, CEL-1, W01D2.1, RPS-21, TAG-68, IFFB-1, RPS-7, VPS-20, RPL-30, RPS-6, RPS-4, RPS-0	246	392	11373	4.12783	5.94691e-10	7.43363e-11	3.92461e-09
GOTERM_BP_DIRECT	GO:0008340	determination of adult lifespan	60	20.0669	2.56774e-11	RPL-19, NOL-1, HSF-1, TEG-4, K07C5.4, RPT-3, CRN-3, SET-4, CDGS-1, Y46G5A.6, RSR-2, INS-7, F11A3.2, TBP-1, VPS-37, CGH-1, NOG-1, CCT-2, EIF-1.A, HTAS-1, TARS-1, T27F7.4, B0511.6, C42C1.3, RPL-30, RPS-6, RPS-5, Y51H4A.15, NPP-2, RPS-3, UFD-1, RPS-11, RPS-8, Y47D3A.29, RPS-15, RARS-1, RBX-1, HPO-31, IFTB-1, RPS-10, RHA-2, VHP-1, CUL-1, QARS-1, EIF-3.B, MDT-26, UTP-20, RPS-22, CACN-1, RPS-23, INF-1,…	282	976	11627	2.53466	1.17089e-08	9.00682e-10	3.64973e-08
GOTERM_BP_DIRECT	GO:0006364	rRNA processing	15	5.01672	3.92707e-11	NOL-1, TOE-1, E02H1.1, LPD-7, NATH-10, ZK795.3, C47E12.7, C18A3.3, Y23H5B.5, T26G10.1, RPS-7, Y39A1A.14, RPS-6, FIB-1, C16C10.2	282	56	11627	11.0439	1.79074e-08	1.2791e-09	5.58186e-08
GOTERM_BP_DIRECT	GO:0042254	ribosome biogenesis	13	4.34783	3.32603e-10	K12H4.3, C18A3.3, C53H9.2, T20B12.3, TOE-1, T26G10.1, RPS-18, LPD-7, Y39A1A.14, PRO-3, TAG-151, EIF-6, NOG-1	282	44	11627	12.1817	1.51667e-07	1.01111e-08	4.72756e-07
GOTERM_BP_DIRECT	GO:0000028	ribosomal small subunit assembly	8	2.67559	2.4374e-08	RPS-14, RPS-28, RPS-15, RPS-27, RPS-5, RPS-19, RPS-0, RPS-10	282	15	11627	21.9896	1.11145e-05	6.94658e-07	3.46447e-05
GOTERM_MF_DIRECT	GO:0004812	aminoacyl-tRNA ligase activity	10	3.34448	9.08012e-08	IARS-1, HARS-1, WARS-1, FARS-1, RARS-1, QARS-1, AARS-2, GARS-1, NARS-1, TARS-1	228	35	9479	11.8784	1.93405e-05	6.44687e-06	0.000114983
GOTERM_CC_DIRECT	GO:0015935	small ribosomal subunit	7	2.34114	1.4217e-07	RPS-9, RPS-23, RPS-15, RPS-18, RPS-5, RPS-3, RPS-0	246	13	11373	24.894	2.67277e-05	2.96978e-06	0.000176389
GOTERM_MF_DIRECT	GO:0019843	rRNA binding	9	3.01003	2.65961e-07	RPS-9, RPL-25.1, RPL-12, RPL-9, Y39A1A.14, RPS-5, W01D2.1, RPS-4, RPL-11.1	228	29	9479	12.9025	5.66482e-05	1.41623e-05	0.00033679
GOTERM_MF_DIRECT	GO:0000166	nucleotide binding	50	16.7224	9.84493e-07	Y39B6A.36, DYN-1, RPT-3, CRN-3, ASNA-1, CDK-9, NARS-1, ARX-2, CGH-1, Y65B4A.6, NOG-1, CCT-2, RAN-1, RUVB-1, LET-418, IARS-1, T04A8.6, STC-1, NATH-10, TARS-1, ERFA-3, B0511.6, UNC-54, UBC-9, IFFB-1, FARS-1, RPL-25.1, Y47D3A.29, RARS-1, NSF-1, RHA-2, KIN-2, T26G10.1, Y39G10AR.8, UBA-2, QARS-1, GOP-2, F44B9.8, HARS-1, INF-1, CEL-1, NMY-2, VPS-4, PABP-2, W04D2.6, WARS-1, RNP-4, POD-2, AARS-2, GARS-1	228	1013	9479	2.05205	0.000209675	4.19386e-05	0.00124667
GOTERM_BP_DIRECT	GO:0040039	inductive cell migration	16	5.35117	2.01094e-06	PYP-1, NOL-1, CACN-1, T04A8.6, DYN-1, MDT-10, ICD-1, XPO-2, PFD-6, COGC-2, F11A3.2, COGC-4, UBA-2, UNC-32, RPL-11.1, RUVB-1	282	144	11627	4.58117	0.000916569	5.39391e-05	0.00285827
GOTERM_MF_DIRECT	GO:0003743	translation initiation factor activity	9	3.01003	5.59067e-06	EIF-1.A, INF-1, IFFB-1, Y39G10AR.8, F54D5.11, EIF-6, EIF-3.B, EIF-3.E, IFTB-1	228	42	9479	8.90883	0.00119011	0.000198449	0.0070793
GOTERM_CC_DIRECT	GO:0005737	cytoplasm	59	19.7324	6.64601e-06	RPL-18, PYP-1, F23F1.5, DYN-1, RPT-3, ASNA-1, RPN-13, ARX-2, NARS-1, TAF-4, EEF-1G, CGH-1, KIN-10, RAN-1, CCT-2, RUVB-1, IARS-1, IFB-1, TARS-1, UNC-54, UBC-9, DCN-1, CAP-2, FARS-1, LPIN-1, EIF-6, SRPA-68, RPS-0, RARS-1, RBX-1, ULP-2, PFD-6, NSF-1, RHA-2, KIN-2, DNJ-5, VHP-1, EXOS-3, EXOS-2, TFG-1, CUL-1, QARS-1, IMB-3, IMB-2, EIF-3.B, CLP-7, EIF-3.E, IMA-3, GOP-2, CACN-1, HARS-1, SPD-5, WARS-1, Y…	246	1518	11373	1.79688	0.00124867	0.000124938	0.00824532
GOTERM_BP_DIRECT	GO:0042274	ribosomal small subunit biogenesis	5	1.67224	1.10376e-05	T23D8.3, RPS-7, NATH-10, RPS-6, C16C10.2	282	7	11627	29.4504	0.00502051	0.000279581	0.0156875
GOTERM_BP_DIRECT	GO:0032940	secretion by cell	11	3.67893	1.52271e-05	TAF-5, KIN-2, VPS-37, SNR-6, RPL-12, LPIN-1, VPS-20, NPP-20, GBF-1, NSF-1, SMGL-1	282	77	11627	5.89007	0.00691958	0.000365387	0.0216414
GOTERM_CC_DIRECT	GO:0005666	DNA-directed RNA polymerase III complex	6	2.00669	1.60206e-05	RPC-25, LET-611, RPC-2, RPC-1, RPAC-40, RPAC-19	246	16	11373	17.3369	0.00300736	0.000273771	0.0198747
GOTERM_CC_DIRECT	GO:0030686	90S preribosome	5	1.67224	2.43212e-05	UTP-20, TOE-1, RPS-7, WDR-46, RPS-0	246	9	11373	25.6843	0.00456201	0.000380964	0.0301709
GOTERM_MF_DIRECT	GO:0001056	RNA polymerase III activity	6	2.00669	2.65351e-05	RPC-25, LET-611, RPC-2, RPC-1, RPAC-40, RPAC-19	228	16	9479	15.5905	0.00563611	0.00080711	0.0335966
GOTERM_CC_DIRECT	GO:0030688	preribosome, small subunit precursor	4	1.33779	3.88797e-05	Y54E10BR.4, T23D8.3, TAG-151, C47E12.7	246	4	11373	46.2317	0.00728288	0.000562113	0.0482269
GOTERM_BP_DIRECT	GO:0016477	cell migration	13	4.34783	4.49518e-05	RPL-19, CACN-1, RPC-25, TEG-4, LAM-2, RBX-1, SFA-1, C53A5.6, T27F7.4, RPL-21, FIB-1, CUL-1, GUT-2	282	124	11627	4.32255	0.0202898	0.0010244	0.0638747
GOTERM_BP_DIRECT	GO:0042273	ribosomal large subunit biogenesis	6	2.00669	5.2651e-05	C18A3.3, RPL-14, LPD-7, RPL-26, PRO-3, EIF-6	282	18	11627	13.7435	0.0237236	0.00114266	0.0748112
GOTERM_BP_DIRECT	GO:0040018	positive regulation of multicellular organism growth	23	7.69231	5.47397e-05	EIF-1.A, RPL-25.1, CACN-1, HSF-1, HARS-1, D2085.3, Y47H9C.7, K07C5.4, C06E4.6, RPL-36.A, F53H1.1, EKL-7, IFTB-1, ERFA-3, T20B12.3, MDT-8, F30A10.9, Y39G10AR.8, RPL-22, RPL-30, CCT-2, SRPA-68, CLPP-1	282	357	11627	2.65631	0.024653	0.00113399	0.0777778
GOTERM_BP_DIRECT	GO:0006418	tRNA aminoacylation for protein translation	7	2.34114	6.88029e-05	IARS-1, WARS-1, RARS-1, QARS-1, GARS-1, NARS-1, TARS-1	282	30	11627	9.62045	0.0308881	0.00136321	0.0977507
GOTERM_BP_DIRECT	GO:0000027	ribosomal large subunit assembly	6	2.00669	7.00504e-05	K12H4.3, RPL-25.1, RPL-6, RPL-12, RPL-24.1, RPL-11.1	282	19	11627	13.0202	0.0314393	0.00133012	0.0995223
GOTERM_MF_DIRECT	GO:0003899	DNA-directed RNA polymerase activity	7	2.34114	7.87027e-05	RPC-25, LET-611, RPC-2, F10E9.4, RPC-1, RPAC-40, RPAC-19	228	31	9479	9.3878	0.0166246	0.00209335	0.0996166
GOTERM_BP_DIRECT	GO:0006413	translational initiation	8	2.67559	7.95863e-05	EIF-1.A, INF-1, IFFB-1, F54D5.11, EIF-6, EIF-3.B, EIF-3.E, IFTB-1	282	44	11627	7.49645	0.0356421	0.00145066	0.113063
GOTERM_BP_DIRECT	GO:0006352	DNA-templated transcription, initiation	5	1.67224	9.63812e-05	TAF-4, TBP-1, TAF-10, BRF-1, TAF-1	282	11	11627	18.7411	0.0430001	0.00168903	0.136907
GOTERM_BP_DIRECT	GO:0002181	cytoplasmic translation	6	2.00669	0.00011782	RPL-6, RPL-26, RPL-9, RPL-31, RPL-22, RPL-7	282	21	11627	11.7801	0.0523112	0.00198799	0.167337
GOTERM_BP_DIRECT	GO:0007281	germ cell development	15	5.01672	0.000133448	CACN-1, HARS-1, RPS-28, SNR-6, TEG-4, DYN-1, LAM-2, F10E9.4, SFA-1, Y65B4A.6, RPC-2, NOG-1, GUT-2, F43G9.12, SNR-3	282	182	11627	3.39812	0.0590417	0.00217108	0.189514
GOTERM_BP_DIRECT	GO:0006383	transcription from RNA polymerase III promoter	5	1.67224	0.00014183	LET-611, RPC-2, RPC-1, RPAC-40, RPAC-19	282	12	11627	17.1794	0.0626317	0.00222783	0.201406
GOTERM_BP_DIRECT	GO:0006606	protein import into nucleus	6	2.00669	0.000149481	F23F1.5, RAE-1, NPP-2, XPO-2, RAN-1, IMA-3	282	22	11627	11.2447	0.0658968	0.0022697	0.21226
GOTERM_BP_DIRECT	GO:0048477	oogenesis	16	5.35117	0.000176608	GEI-4, R186.3, C23G10.8, W04D2.6, F38A1.8, COGC-2, COGC-4, THOC-2, CGH-1, UNC-32, F21D5.1, POD-1, AARS-2, RAN-1, IMA-3, EIF-3.E	282	210	11627	3.14137	0.0773824	0.00259471	0.250735
GOTERM_MF_DIRECT	GO:0016874	ligase activity	12	4.01338	0.000183123	IARS-1, UBC-9, HARS-1, WARS-1, RARS-1, UBA-2, POD-2, QARS-1, AARS-2, GARS-1, NARS-1, TARS-1	228	124	9479	4.02334	0.0382578	0.00432494	0.231644
GOTERM_MF_DIRECT	GO:0004386	helicase activity	10	3.34448	0.000266158	LET-418, RHA-2, Y39B6A.36, B0511.6, INF-1, T26G10.1, CGH-1, Y65B4A.6, F53H1.1, RUVB-1	228	89	9479	4.6713	0.0551217	0.00565387	0.336517
GOTERM_MF_DIRECT	GO:0003676	nucleic acid binding	24	8.02676	0.000348882	Y53F4B.13, XRN-2, C03D6.1, C16A3.6, T04A8.6, INF-1, Y47D3A.29, TEG-4, RPS-18, CRN-3, SFA-1, F53H1.1, PABP-2, W04D2.6, NARS-1, RHA-2, B0511.6, T26G10.1, RNP-4, CGH-1, Y62E10A.2, Y65B4A.6, LIN-15B, AARS-2	228	440	9479	2.2677	0.07163	0.00673404	0.440897
GOTERM_BP_DIRECT	GO:0006397	mRNA processing	9	3.01003	0.000398729	Y53F4B.13, XRN-2, DBR-1, RNP-4, SNR-6, CEL-1, GUT-2, W04D2.6, SNR-3	282	74	11627	5.01452	0.166279	0.0056669	0.565255
GOTERM_BP_DIRECT	GO:0006351	transcription, DNA-templated	28	9.36455	0.000753412	Y39B6A.36, RPC-25, LIN-9, CDK-9, SET-4, SPR-2, TBP-1, SNPC-4, LET-611, RPAC-19, MDT-26, RUVB-1, XRN-2, MDT-10, F54D5.11, ICD-1, RPAC-40, DPL-1, TAF-1, MDT-8, TAG-68, MDT-4, RPC-2, F55A3.3, RPC-1, LIN-54, MDT-18, MDT-17	282	576	11627	2.00426	0.290848	0.0103607	1.06557
GOTERM_MF_DIRECT	GO:0004004	ATP-dependent RNA helicase activity	7	2.34114	0.000934373	RHA-2, B0511.6, INF-1, T26G10.1, CGH-1, Y65B4A.6, F53H1.1	228	48	9479	6.06296	0.180544	0.016456	1.17678
GOTERM_BP_DIRECT	GO:0007276	gamete generation	10	3.34448	0.00104902	K12H4.3, TOE-1, CGH-1, E02H1.1, LET-716, NATH-10, RBX-1, BYN-1, RPL-11.1, IMA-3	282	106	11627	3.88967	0.380354	0.013978	1.48077
GOTERM_BP_DIRECT	GO:0043039	tRNA aminoacylation	4	1.33779	0.00105301	FARS-1, QARS-1, AARS-2, TARS-1	282	9	11627	18.3247	0.381479	0.0136326	1.48635
GOTERM_BP_DIRECT	GO:0043652	engulfment of apoptotic cell	9	3.01003	0.00136871	KIN-2, SWD-2.2, B0511.6, DYN-1, AGEF-1, TFG-1, VPS-4, ARX-2, DYCI-1	282	89	11627	4.16938	0.464503	0.0171993	1.92797
GOTERM_BP_DIRECT	GO:0010501	RNA secondary structure unwinding	6	2.00669	0.00162333	B0511.6, INF-1, T26G10.1, CGH-1, Y65B4A.6, F53H1.1	282	36	11627	6.87175	0.523287	0.0198236	2.28279
GOTERM_CC_DIRECT	GO:0030687	preribosome, large subunit precursor	5	1.67224	0.0024969	C18A3.3, C16A3.6, LPD-7, EIF-6, C47E12.7	246	27	11373	8.56143	0.375	0.0330144	3.05413
GOTERM_MF_DIRECT	GO:0030515	snoRNA binding	4	1.33779	0.00254092	F13H8.2, TOE-1, K07C5.4, ZK795.3	228	12	9479	13.8582	0.41836	0.0408281	3.17035
GOTERM_MF_DIRECT	GO:0003924	GTPase activity	9	3.01003	0.00303686	F38A1.8, C53H9.2, IFFB-1, Y39G10AR.8, DYN-1, TAG-151, RAN-1, GOP-2, ERFA-3	228	102	9479	3.66834	0.476823	0.0452196	3.77824
GOTERM_MF_DIRECT	GO:0016779	nucleotidyltransferase activity	6	2.00669	0.00345631	Y47D3A.29, RPC-2, RPC-1, CEL-1, HPO-31, CDGS-1	228	43	9479	5.8011	0.521678	0.0479757	4.28963
GOTERM_BP_DIRECT	GO:0016246	RNA interference	11	3.67893	0.0034731	RHA-2, W04A4.5, T23D8.3, SPD-5, KIN-10, E02H1.1, IMB-2, XPO-2, F43G9.12, IMA-3, RUVB-1	282	150	11627	3.02357	0.795357	0.0408902	4.82491
GOTERM_MF_DIRECT	GO:0005524	ATP binding	37	12.3746	0.00356854	Y39B6A.36, F23F1.5, Y50D7A.11, RARS-1, RPT-3, ASNA-1, CDK-9, F53H1.1, NSF-1, NARS-1, ARX-2, RHA-2, T26G10.1, CGH-1, UBA-2, Y65B4A.6, QARS-1, CCT-2, RUVB-1, LET-418, IARS-1, F44B9.8, HARS-1, INF-1, STC-1, NATH-10, NMY-2, VPS-4, TARS-1, B0511.6, UNC-54, UBC-9, WARS-1, FARS-1, POD-2, AARS-2, GARS-1	228	950	9479	1.61922	0.533015	0.0464765	4.42604
GOTERM_BP_DIRECT	GO:0006396	RNA processing	6	2.00669	0.00361322	RHA-2, RNP-4, LET-716, HPO-31, CRN-3, SNR-3	282	43	11627	5.75309	0.808068	0.0414403	5.01495
GOTERM_MF_DIRECT	GO:0008565	protein transporter activity	5	1.67224	0.00364549	COGC-2, F23F1.5, IMB-3, IMB-2, IMA-3	228	27	9479	7.69899	0.540634	0.0447281	4.51945
GOTERM_MF_DIRECT	GO:0003729	mRNA binding	6	2.00669	0.00464483	RPL-35, THOC-2, RNP-4, PUF-12, RPS-5, W04D2.6	228	46	9479	5.42277	0.629037	0.0536018	5.72509
GOTERM_MF_DIRECT	GO:0005047	signal recognition particle binding	3	1.00334	0.00544388	F38A1.8, R186.3, SRPA-68	228	5	9479	24.9447	0.687364	0.0593607	6.67899
GOTERM_BP_DIRECT	GO:0000154	rRNA modification	3	1.00334	0.00554617	E02H1.1, K07C5.4, NATH-10	282	5	11627	24.7383	0.920825	0.0614342	7.60078
GOTERM_BP_DIRECT	GO:0000122	negative regulation of transcription from RNA polymerase II promoter	8	2.67559	0.0056956	LET-418, UBC-9, HARS-1, FARS-1, RARS-1, F43G9.12, IFTB-1, NARS-1	282	89	11627	3.70611	0.926069	0.0615515	7.79793
GOTERM_BP_DIRECT	GO:0000470	maturation of LSU-rRNA	4	1.33779	0.00619299	RPL-7A, NOL-1, C16A3.6, EIF-6	282	16	11627	10.3076	0.941151	0.0652229	8.45135
GOTERM_BP_DIRECT	GO:0040007	growth	11	3.67893	0.006494	IFB-1, CAP-2, T23D8.3, MDT-10, HMGS-1, LPIN-1, CRN-3, GUT-2, ULP-2, IFTB-1, RUVB-1	282	164	11627	2.76546	0.948744	0.0667584	8.8447
GOTERM_MF_DIRECT	GO:0001104	RNA polymerase II transcription cofactor activity	4	1.33779	0.00718998	MDT-8, MDT-10, MDT-4, MDT-18	228	17	9479	9.78225	0.784974	0.0739711	8.7326
GOTERM_BP_DIRECT	GO:0006367	transcription initiation from RNA polymerase II promoter	4	1.33779	0.00738724	Y39B6A.36, ZK550.4, F54D5.11, F10E9.4	282	17	11627	9.70129	0.965989	0.0739646	10.0027
GOTERM_CC_DIRECT	GO:0016592	mediator complex	4	1.33779	0.00741361	MDT-8, MDT-10, MDT-4, MDT-18	246	19	11373	9.73299	0.753144	0.0890464	8.81889
GOTERM_CC_DIRECT	GO:0000178	exosome (RNase complex)	3	1.00334	0.00903679	EXOS-3, EXOS-2, CRN-3	246	7	11373	19.8136	0.818525	0.101173	10.6517
GOTERM_BP_DIRECT	GO:0018991	oviposition	17	5.68562	0.0107676	RPA-2, IFB-1, T04A8.6, W04D2.6, COGC-4, UNC-54, DCN-1, UBC-9, PUF-12, T01B7.5, TFG-1, UBA-2, LET-716, MDT-4, Y65B4A.6, NPP-2, MDT-17	282	349	11627	2.00836	0.992821	0.1039	14.2624
GOTERM_MF_DIRECT	GO:0016876	ligase activity, forming aminoacyl-tRNA and related compounds	3	1.00334	0.0110755	QARS-1, AARS-2, TARS-1	228	7	9479	17.8177	0.90673	0.106818	13.154
GOTERM_BP_DIRECT	GO:0000463	maturation of LSU-rRNA from tricistronic rRNA transcript (SSU-rRNA, 5.8S rRNA, LSU-rRNA)	3	1.00334	0.0112798	RPL-35, LPD-7, RPL-7	282	7	11627	17.6702	0.994331	0.10636	14.8912
GOTERM_CC_DIRECT	GO:0070847	core mediator complex	3	1.00334	0.0118789	MDT-10, MDT-4, MDT-18	246	8	11373	17.3369	0.894242	0.123793	13.7795
GOTERM_MF_DIRECT	GO:0005525	GTP binding	12	4.01338	0.0143158	F38A1.8, C53H9.2, IFFB-1, Y39G10AR.8, DYN-1, R186.3, TAG-151, CEL-1, NOG-1, RAN-1, GOP-2, ERFA-3	228	215	9479	2.32044	0.953639	0.130298	16.6893
GOTERM_BP_DIRECT	GO:0006357	regulation of transcription from RNA polymerase II promoter	9	3.01003	0.0147385	MDT-8, MDT-10, ZK550.4, MDT-4, F54D5.11, LIN-54, DPL-1, MDT-18, RUVB-1	282	132	11627	2.81117	0.998853	0.134163	19.0265
GOTERM_CC_DIRECT	GO:0005829	cytosol	14	4.68227	0.0156633	C53H9.2, IARS-1, RPS-18, XPO-2, ULP-2, ERFA-3, KIN-2, VPS-37, UBA-2, F21D5.1, EIF-6, QARS-1, AARS-2, IMA-3	246	307	11373	2.10829	0.948594	0.152012	17.7882
GOTERM_BP_DIRECT	GO:0040027	negative regulation of vulval development	12	4.01338	0.0178756	LET-418, UBC-9, GEI-4, SNR-6, UBA-2, LIN-9, DPY-30, LIN-54, LIN-15B, GUT-2, RSR-2, SNR-3	282	220	11627	2.24894	0.999732	0.157477	22.6152
GOTERM_CC_DIRECT	GO:0034399	nuclear periphery	3	1.00334	0.0185571	C18A3.3, IMB-3, IMB-2	246	10	11373	13.8695	0.970445	0.169181	20.737
GOTERM_BP_DIRECT	GO:0030490	maturation of SSU-rRNA	3	1.00334	0.0187296	RPS-28, Y54E10BR.4, Y48G1A.4	282	9	11627	13.7435	0.99982	0.161342	23.5661
GOTERM_BP_DIRECT	GO:0015031	protein transport	9	3.01003	0.0203012	COGC-2, COGC-4, PRO-3, APM-1, NPP-20, RAE-1, RAN-1, IMA-3, NSF-1	282	140	11627	2.65053	0.999913	0.1706	25.2878
GOTERM_BP_DIRECT	GO:0006614	SRP-dependent cotranslational protein targeting to membrane	3	1.00334	0.0230426	F38A1.8, R186.3, SRPA-68	282	10	11627	12.3691	0.999976	0.188149	28.205
GOTERM_BP_DIRECT	GO:0006607	NLS-bearing protein import into nucleus	3	1.00334	0.0230426	IMB-3, IMB-2, IMA-3	282	10	11627	12.3691	0.999976	0.188149	28.205
GOTERM_BP_DIRECT	GO:0043066	negative regulation of apoptotic process	4	1.33779	0.0266225	CGH-1, TFG-1, ICD-1, CUL-1	282	27	11627	6.10822	0.999995	0.210711	31.8552
GOTERM_CC_DIRECT	GO:0000176	nuclear exosome (RNase complex)	3	1.00334	0.0308316	EXOS-3, EXOS-2, CRN-3	246	13	11373	10.6689	0.997226	0.255006	32.1957
GOTERM_BP_DIRECT	GO:0000398	mRNA splicing, via spliceosome	6	2.00669	0.0315237	DBR-1, SNR-6, TEG-4, SFA-1, GUT-2, F53H1.1	282	73	11627	3.38881	1	0.240875	36.5733
GOTERM_MF_DIRECT	GO:0008139	nuclear localization sequence binding	3	1.00334	0.0321753	IMB-3, IMB-2, IMA-3	228	12	9479	10.3936	0.999057	0.261305	33.9091
GOTERM_BP_DIRECT	GO:0044237	cellular metabolic process	3	1.00334	0.0327411	F11A3.2, Y47H9C.7, CRN-3	282	12	11627	10.3076	1	0.245053	37.6972
GOTERM_BP_DIRECT	GO:0010468	regulation of gene expression	4	1.33779	0.0350581	CACN-1, INF-1, Y65B4A.6, F53H1.1	282	30	11627	5.4974	1	0.256124	39.7853
GOTERM_MF_DIRECT	GO:0017025	TBP-class protein binding	3	1.00334	0.0374353	BRF-1, RPT-3, TAF-1	228	13	9479	9.59413	0.999704	0.287245	38.3163
GOTERM_BP_DIRECT	GO:0006446	regulation of translational initiation	3	1.00334	0.0380873	Y47H9C.7, EIF-3.B, EIF-3.E	282	13	11627	9.51473	1	0.271086	42.4171
GOTERM_BP_DIRECT	GO:0051028	mRNA transport	3	1.00334	0.0380873	RNP-4, NPP-20, RAE-1	282	13	11627	9.51473	1	0.271086	42.4171
GOTERM_BP_DIRECT	GO:0090502	RNA phosphodiester bond hydrolysis, endonucleolytic	4	1.33779	0.038141	H35B03.2, DBR-1, Y54E10BR.4, Y62E10A.2	282	31	11627	5.32006	1	0.267359	42.4628
GOTERM_CC_DIRECT	GO:0030692	Noc4p-Nop14p complex	2	0.668896	0.0426223	T20B12.3, Y48G1A.4	246	2	11373	46.2317	0.999722	0.322903	41.7491
GOTERM_CC_DIRECT	GO:0008290	F-actin capping protein complex	2	0.668896	0.0426223	CAP-1, CAP-2	246	2	11373	46.2317	0.999722	0.322903	41.7491
GOTERM_CC_DIRECT	GO:0000126	transcription factor TFIIIB complex	2	0.668896	0.0426223	B0261.1, BRF-1	246	2	11373	46.2317	0.999722	0.322903	41.7491
GOTERM_CC_DIRECT	GO:0005673	transcription factor TFIIE complex	2	0.668896	0.0426223	ZK550.4, F54D5.11	246	2	11373	46.2317	0.999722	0.322903	41.7491
GOTERM_BP_DIRECT	GO:0006355	regulation of transcription, DNA-templated	27	9.0301	0.0449818	Y39B6A.36, HSF-1, LIN-9, CDK-9, SET-4, TAF-5, TAF-4, SPR-2, SNPC-4, F43G9.12, RUVB-1, LET-418, XRN-2, HIS-61, MDT-10, ICD-1, F54D5.11, DPL-1, TAF-1, MDT-8, TAG-68, BRF-1, MDT-4, F55A3.3, LIN-54, MDT-18, MDT-17	282	758	11627	1.46863	1	0.303614	48.0137
GOTERM_BP_DIRECT	GO:0035046	pronuclear migration	5	1.67224	0.0460381	Y47D3A.29, CAP-2, SPD-5, RBX-1, DYCI-1	282	56	11627	3.68129	1	0.305297	48.825
GOTERM_MF_DIRECT	GO:0000146	microfilament motor activity	2	0.668896	0.0473243	UNC-54, NMY-2	228	2	9479	41.5746	0.999967	0.338375	45.8774
GOTERM_BP_DIRECT	GO:0071034	CUT catabolic process	2	0.668896	0.0477537	EXOS-3, EXOS-2	282	2	11627	41.2305	1	0.310563	50.1177
GOTERM_BP_DIRECT	GO:0071049	nuclear retention of pre-mRNA with aberrant 3'-ends at the site of transcription	2	0.668896	0.0477537	EXOS-3, EXOS-2	282	2	11627	41.2305	1	0.310563	50.1177
GOTERM_BP_DIRECT	GO:0006407	rRNA export from nucleus	2	0.668896	0.0477537	RPS-28, RPS-0	282	2	11627	41.2305	1	0.310563	50.1177
GOTERM_BP_DIRECT	GO:0000461	endonucleolytic cleavage to generate mature 3'-end of SSU-rRNA from (SSU-rRNA, 5.8S rRNA, LSU-rRNA)	2	0.668896	0.0477537	RPS-21, RPS-0	282	2	11627	41.2305	1	0.310563	50.1177
GOTERM_CC_DIRECT	GO:0005694	chromosome	6	2.00669	0.048371	F55A3.3, HTAS-1, HIS-63, CDK-9, RAN-1, SET-4	246	92	11373	3.01511	0.99991	0.345369	45.9431
GOTERM_BP_DIRECT	GO:0046580	negative regulation of Ras protein signal transduction	3	1.00334	0.049681	GEI-4, LIN-15B, DPL-1	282	15	11627	8.2461	1	0.316773	51.5337
GOTERM_CC_DIRECT	GO:0032154	cleavage furrow	3	1.00334	0.0508241	DYN-1, POD-1, NMY-2	246	17	11373	8.15854	0.999945	0.347119	47.6468
GOTERM_BP_DIRECT	GO:0007049	cell cycle	8	2.67559	0.0533173	SPD-5, LIN-9, EMB-27, CUL-1, RBX-1, LIN-54, RAN-1, DPL-1	282	140	11627	2.35603	1	0.331675	54.1041
GOTERM_BP_DIRECT	GO:0001731	formation of translation preinitiation complex	3	1.00334	0.0558936	Y39G10AR.8, EIF-3.B, EIF-3.E	282	16	11627	7.73072	1	0.340523	55.8478
GOTERM_BP_DIRECT	GO:0040022	feminization of hermaphroditic germ-line	4	1.33779	0.0593883	CACN-1, RNP-4, CAP-2, F43G9.12	282	37	11627	4.45735	1	0.353529	58.1149
GOTERM_BP_DIRECT	GO:0040020	regulation of meiotic nuclear division	6	2.00669	0.0617635	CACN-1, TEG-4, Y65B4A.6, SFA-1, GUT-2, F43G9.12	282	88	11627	2.81117	1	0.360618	59.5934
GOTERM_CC_DIRECT	GO:0005785	signal recognition particle receptor complex	2	0.668896	0.06325	F38A1.8, R186.3	246	3	11373	30.8211	0.999995	0.400597	55.5432
GOTERM_BP_DIRECT	GO:0008033	tRNA processing	4	1.33779	0.0633709	H35B03.2, NATH-10, Y62E10A.2, FIB-1	282	38	11627	4.34005	1	0.363852	60.5663
GOTERM_MF_DIRECT	GO:0005516	calmodulin binding	4	1.33779	0.0659501	RPL-7A, HSF-1, NMY-2, PPK-1	228	39	9479	4.26406	1	0.428176	57.8505
GOTERM_MF_DIRECT	GO:0001076	transcription factor activity, RNA polymerase II transcription factor binding	2	0.668896	0.0701435	ZK550.4, F54D5.11	228	3	9479	27.7164	1	0.436574	60.185
GOTERM_BP_DIRECT	GO:0006610	ribosomal protein import into nucleus	2	0.668896	0.0707715	IMB-3, IMB-2	282	3	11627	27.487	1	0.393204	64.771
GOTERM_BP_DIRECT	GO:1902626	assembly of large subunit precursor of preribosome	2	0.668896	0.0707715	RPL-24.1, EIF-6	282	3	11627	27.487	1	0.393204	64.771
GOTERM_BP_DIRECT	GO:0000060	protein import into nucleus, translocation	2	0.668896	0.0707715	IMB-3, IMB-2	282	3	11627	27.487	1	0.393204	64.771
GOTERM_BP_DIRECT	GO:0000054	ribosomal subunit export from nucleus	2	0.668896	0.0707715	EIF-6, RAN-1	282	3	11627	27.487	1	0.393204	64.771
GOTERM_BP_DIRECT	GO:0051693	actin filament capping	2	0.668896	0.0707715	CAP-1, CAP-2	282	3	11627	27.487	1	0.393204	64.771
GOTERM_BP_DIRECT	GO:0032259	methylation	6	2.00669	0.0718767	Y53F4B.13, NOL-1, E02H1.1, Y39A1A.14, FIB-1, SET-4	282	92	11627	2.68895	1	0.393589	65.362
GOTERM_MF_DIRECT	GO:0008168	methyltransferase activity	6	2.00669	0.0721154	Y53F4B.13, NOL-1, E02H1.1, Y39A1A.14, FIB-1, SET-4	228	93	9479	2.68223	1	0.434123	61.2411
GOTERM_CC_DIRECT	GO:0005635	nuclear envelope	4	1.33779	0.0723753	UBC-9, LPIN-1, XPO-2, IMA-3	246	45	11373	4.10949	0.999999	0.431619	60.6276
GOTERM_MF_DIRECT	GO:0000049	tRNA binding	3	1.00334	0.0818073	IARS-1, FARS-1, AARS-2	228	20	9479	6.23618	1	0.465736	66.0667
GOTERM_CC_DIRECT	GO:0005851	eukaryotic translation initiation factor 2B complex	2	0.668896	0.083435	F11A3.2, Y47H9C.7	246	4	11373	23.1159	1	0.467388	66.0716
GOTERM_CC_DIRECT	GO:0070176	DRM complex	2	0.668896	0.083435	LIN-9, LIN-54	246	4	11373	23.1159	1	0.467388	66.0716
GOTERM_CC_DIRECT	GO:0070971	endoplasmic reticulum exit site	2	0.668896	0.083435	TFG-1, GBF-1	246	4	11373	23.1159	1	0.467388	66.0716
GOTERM_CC_DIRECT	GO:0005654	nucleoplasm	4	1.33779	0.0883869	LPD-7, LPIN-1, FIB-1, IMA-3	246	49	11373	3.77402	1	0.474996	68.277
GOTERM_MF_DIRECT	GO:0005515	protein binding	31	10.3679	0.0900478	RPA-2, HSF-1, RPS-16, GEI-4, DYN-1, ASNA-1, RPS-10, NSF-1, DYCI-1, TAF-4, VPS-37, KIN-10, CGH-1, CCT-2, RAN-1, IMA-3, GOP-2, RUVB-1, LET-418, IFB-1, SPD-5, RPL-6, H06I04.1, ICD-1, RPS-21, C18A3.3, K10H10.4, UBC-9, UNC-54, DCN-1, RPS-0	228	975	9479	1.32186	1	0.48828	69.7276
GOTERM_MF_DIRECT	GO:0046523	S-methyl-5-thioribose-1-phosphate isomerase activity	2	0.668896	0.0924185	F11A3.2, Y47H9C.7	228	4	9479	20.7873	1	0.48639	70.7113
GOTERM_BP_DIRECT	GO:0000447	endonucleolytic cleavage in ITS1 to separate SSU-rRNA from 5.8S rRNA and LSU-rRNA from tricistronic rRNA transcript (SSU-rRNA, 5.8S rRNA, LSU-rRNA)	2	0.668896	0.0932347	RPS-21, RPS-0	282	4	11627	20.6152	1	0.476283	75.1206
GOTERM_BP_DIRECT	GO:0070475	rRNA base methylation	2	0.668896	0.0932347	NOL-1, Y39A1A.14	282	4	11627	20.6152	1	0.476283	75.1206
GOTERM_BP_DIRECT	GO:0006384	transcription initiation from RNA polymerase III promoter	2	0.668896	0.0932347	RPC-25, BRF-1	282	4	11627	20.6152	1	0.476283	75.1206
GOTERM_BP_DIRECT	GO:0000059	protein import into nucleus, docking	2	0.668896	0.0932347	IMB-3, IMB-2	282	4	11627	20.6152	1	0.476283	75.1206
GOTERM_BP_DIRECT	GO:0009794	regulation of mitotic cell cycle, embryonic	2	0.668896	0.0932347	TAF-4, TAF-10	282	4	11627	20.6152	1	0.476283	75.1206
GOTERM_CC_DIRECT	GO:0071011	precatalytic spliceosome	3	1.00334	0.0935904	SNR-6, GUT-2, SNR-3	246	24	11373	5.77896	1	0.483031	70.4519
GOTERM_BP_DIRECT	GO:0008380	RNA splicing	4	1.33779	0.0944806	RNP-4, SNR-6, Y65B4A.6, SNR-3	282	45	11627	3.66493	1	0.476135	75.6021

## Sheet: Enhancers
		Biological Process
		Cellular Component
		Molecular Function
Category	ID	Term	Count	%	PValue	Genes	List Total	Pop Hits	Pop Total	Fold Enrichment	Bonferroni	Benjamini	FDR
GOTERM_CC_DIRECT	GO:0005739	mitochondrion	37	43.0233	1.66352e-34	GFM-1, Y67H2A.7, NUAF-3, MECR-1, NUAF-1, C08F8.2, ASG-2, F46B6.6, ECH-6, F02A9.4, PRX-10, YARS-2, SDHA-1, MRPS-24, CRI-3, MRPL-32, FRH-1, SDHD-1, HOE-1, EARS-2, B0035.15, MOMA-1, F44G4.2, Y82E9BR.3, OXA-1, TIN-9.1, SCPL-4, SUCG-1, MRPS-16, FUM-1, MRPS-17, MRPS-14, COX-11, Y62E10A.6, C50F4.12, MRPS-31, MEV-1	67	424	11373	14.8128	7.31951e-33	7.31951e-33	1.55635e-31
GOTERM_MF_DIRECT	GO:0003735	structural constituent of ribosome	18	20.9302	5.68398e-17	MRPL-17, C47E12.2, SLC-25A32, MRPS-2, SLC-25A26, MRPS-16, MRPS-17, MRPS-14, F32A7.4, T14B4.2, MRPL-46, MRPL-34, MRPS-24, MRPL-22, MRPL-32, MRPS-31, MRPL-4, MRPS-11	55	179	9479	17.3308	8.10463e-15	8.10463e-15	1.11022e-13
GOTERM_CC_DIRECT	GO:0005763	mitochondrial small ribosomal subunit	10	11.6279	5.13211e-15	MRPS-16, MRPS-17, MRPS-14, F32A7.4, T14B4.2, MRPS-28, MRPS-2, MRPS-24, MRPS-31, MRPS-11	67	24	11373	70.7276	2.24709e-13	1.12355e-13	4.77396e-12
GOTERM_CC_DIRECT	GO:0005840	ribosome	15	17.4419	2.31579e-13	MRPS-16, MRPL-17, MRPS-17, MRPS-14, T14B4.2, MRPS-28, MRPL-46, MRPS-24, MRPS-2, MRPL-34, MRPL-22, MRPS-31, MRPL-32, MRPS-11, MRPL-4	67	158	11373	16.1152	1.01901e-11	3.39673e-12	2.16671e-10
GOTERM_BP_DIRECT	GO:0006412	translation	18	20.9302	4.8275e-13	EARS-2, C47E12.2, MRPL-17, GFM-1, SLC-25A32, MRPS-2, SLC-25A26, MRPS-16, MRPS-14, F32A7.4, T14B4.2, YARS-2, PRX-10, MRPS-24, MRPL-22, MRPL-32, MRPL-4, MRPS-11	76	260	11627	10.5914	4.97207e-11	4.97207e-11	5.38769e-10
GOTERM_BP_DIRECT	GO:0006898	receptor-mediated endocytosis	26	30.2326	1.70115e-12	MRPL-17, GFM-1, F29B9.8, C08F8.2, MRPS-2, F46B6.6, T14B4.2, K03B4.1, Y56A3A.19, SARS-2, HOE-1, MRPL-4, C47E12.2, EARS-2, Y82E9BR.3, OXA-1, F25H9.6, LETM-1, F10E7.6, MRPS-16, FUM-1, COX-11, C50F4.12, C56G2.3, MEV-1, MRPS-11	76	733	11627	5.42655	1.75223e-10	8.76115e-11	1.89873e-09
GOTERM_BP_DIRECT	GO:0009792	embryo development ending in birth or egg hatching	48	55.814	5.36432e-11	B0513.7, MRPL-17, LPD-9, GFM-1, LPD-8, F29B9.8, C08F8.2, R144.11, MRPS-2, ASG-2, HPO-18, B0205.6, T14B4.2, F02A9.4, PRX-10, YARS-2, ZK550.3, K03B4.1, MRPS-24, SDHA-1, MRPL-34, SARS-2, Y38E10A.24, FRH-1, MRPL-32, SDHD-1, MRPL-4, HOE-1, EARS-2, C47E12.2, F44G4.2, Y82E9BR.3, OXA-1, F23H11.5, LETM-1, SCPL-4, SUCG-1, MRPS-16, FUM-1, MRPS-17, MRPS-14, F32A7.4, C50F4.12, C35D10.5, ORC-1, MRPL-22, MRPS-1…	76	3091	11627	2.37573	5.52525e-09	1.84175e-09	5.98717e-08
GOTERM_BP_DIRECT	GO:0002119	nematode larval development	38	44.186	1.31037e-10	B0513.7, LPD-9, MRPL-17, GFM-1, LPD-8, C08F8.2, MRPS-2, R144.11, HPO-18, B0205.6, ECH-6, T14B4.2, F02A9.4, YARS-2, COPD-1, Y56A3A.19, K03B4.1, SARS-2, Y38E10A.24, FRH-1, MRPL-32, SDHD-1, MRPL-4, HOE-1, EARS-2, C47E12.2, F44G4.2, Y82E9BR.3, OXA-1, F23H11.5, F25H9.6, FUM-1, ARD-1, MRPS-17, MRPS-14, C50F4.12, ORC-1, MRPL-22	76	1993	11627	2.91696	1.34969e-08	3.37422e-09	1.46252e-07
GOTERM_CC_DIRECT	GO:0005743	mitochondrial inner membrane	11	12.7907	2.98961e-10	C47E12.2, MOMA-1, F44G4.2, TIN-9.1, LETM-1, SCPL-4, SDHA-1, MRPL-32, SDHD-1, HPO-18, MEV-1	67	102	11373	18.306	1.31543e-08	3.28857e-09	2.797e-07
GOTERM_BP_DIRECT	GO:0032543	mitochondrial translation	7	8.13953	1.5626e-08	MRPS-16, MRPS-17, T14B4.2, C50F4.12, MRPS-2, MRPS-24, MRPS-11	76	27	11627	39.6633	1.60947e-06	3.21895e-07	1.74403e-05
GOTERM_CC_DIRECT	GO:0005759	mitochondrial matrix	8	9.30233	6.8507e-08	ECH-6, F02A9.4, Y62E10A.6, PRX-10, Y67H2A.7, C08F8.2, CRI-3, F39H2.3	67	63	11373	21.5551	3.0143e-06	6.02862e-07	6.40934e-05
GOTERM_BP_DIRECT	GO:0000003	reproduction	35	40.6977	1.56699e-07	B0513.7, LPD-9, GFM-1, C25H3.8, C08F8.2, R144.11, ASG-2, HPO-18, B0205.6, T14B4.2, YARS-2, ZK550.3, MRPS-28, COPD-1, Y38E10A.24, FRH-1, MRPL-32, MRPL-4, EARS-2, C47E12.2, F44G4.2, F23H11.5, TIN-9.1, F25H9.6, SCPL-4, FUM-1, MRPS-17, ARD-1, MRPS-14, COX-11, HMG-5, ORC-1, C56G2.3, MRPL-22, MEV-1	76	2205	11627	2.42836	1.61399e-05	2.69e-06	0.000174893
GOTERM_CC_DIRECT	GO:0005762	mitochondrial large ribosomal subunit	5	5.81395	5.74803e-06	MRPL-17, MRPL-46, MRPL-34, MRPL-22, MRPL-32	67	21	11373	40.4158	0.000252882	4.21514e-05	0.00537758
GOTERM_BP_DIRECT	GO:0006099	tricarboxylic acid cycle	5	5.81395	1.82295e-05	FUM-1, SDHA-1, SUCG-1, SDHD-1, MEV-1	76	25	11627	30.5974	0.00187589	0.0002682	0.0203442
GOTERM_CC_DIRECT	GO:0030529	intracellular ribonucleoprotein complex	7	8.13953	0.00019469	MRPS-16, MRPS-17, MRPS-14, MRPS-24, MRPL-22, MRPS-31, MRPL-32	67	146	11373	8.13852	0.00853061	0.00122314	0.181999
GOTERM_BP_DIRECT	GO:0006418	tRNA aminoacylation for protein translation	4	4.65116	0.000923475	EARS-2, PRX-10, YARS-2, SARS-2	76	30	11627	20.3982	0.0907743	0.0118248	1.02588
GOTERM_MF_DIRECT	GO:0004812	aminoacyl-tRNA ligase activity	4	4.65116	0.00100551	EARS-2, PRX-10, YARS-2, SARS-2	55	35	9479	19.6966	0.0708074	0.0360537	1.04458
GOTERM_BP_DIRECT	GO:0016226	iron-sulfur cluster assembly	3	3.48837	0.0030584	LPD-8, FRH-1, F39H2.3	76	13	11627	35.3047	0.270575	0.034448	3.36097
GOTERM_MF_DIRECT	GO:0016874	ligase activity	5	5.81395	0.00532768	EARS-2, F02A9.4, PRX-10, YARS-2, SUCG-1	55	124	9479	6.94941	0.322916	0.121893	5.42326
GOTERM_BP_DIRECT	GO:0015986	ATP synthesis coupled proton transport	3	3.48837	0.00872428	Y82E9BR.3, ASG-2, HPO-18	76	22	11627	20.8618	0.594463	0.0863012	9.31695
GOTERM_BP_DIRECT	GO:0051205	protein insertion into membrane	2	2.32558	0.0128599	OXA-1, Y55F3AR.1	76	2	11627	152.987	0.736359	0.11414	13.4512
GOTERM_CC_DIRECT	GO:0005749	mitochondrial respiratory chain complex II, succinate dehydrogenase complex (ubiquinone)	2	2.32558	0.0173103	SDHD-1, MEV-1	67	3	11373	113.164	0.53621	0.0915728	15.0722
GOTERM_BP_DIRECT	GO:0040007	growth	5	5.81395	0.0213836	B0513.7, K03B4.1, Y38E10A.24, FRH-1, HPO-18	76	164	11627	4.66423	0.892084	0.169339	21.4357
GOTERM_CC_DIRECT	GO:0045263	proton-transporting ATP synthase complex, coupling factor F(o)	2	2.32558	0.0286863	Y82E9BR.3, ASG-2	67	5	11373	67.8985	0.722144	0.132634	23.8379
GOTERM_MF_DIRECT	GO:0000104	succinate dehydrogenase activity	2	2.32558	0.0281672	SDHD-1, MEV-1	55	5	9479	68.9382	0.875782	0.406329	25.7868
GOTERM_CC_DIRECT	GO:0015934	large ribosomal subunit	2	2.32558	0.0455074	MRPL-22, MRPL-32	67	8	11373	42.4366	0.871177	0.185297	35.3219
GOTERM_CC_DIRECT	GO:0000276	mitochondrial proton-transporting ATP synthase complex, coupling factor F(o)	2	2.32558	0.0455074	Y82E9BR.3, ASG-2	67	8	11373	42.4366	0.871177	0.185297	35.3219
GOTERM_BP_DIRECT	GO:0008340	determination of adult lifespan	12	13.9535	0.047571	B0513.7, C47E12.2, CPNA-3, YARS-2, MECR-1, Y56A3A.19, MRPL-46, SLC-25A32, FRH-1, ASG-2, SDHD-1, MEV-1	76	976	11627	1.88099	0.993397	0.320344	41.9572
GOTERM_BP_DIRECT	GO:0055114	oxidation-reduction process	8	9.30233	0.0507513	ARD-1, F44G4.2, Y62E10A.6, MECR-1, SDHA-1, FRH-1, SDHD-1, MEV-1	76	522	11627	2.34463	0.995321	0.318319	44.084
GOTERM_BP_DIRECT	GO:0043039	tRNA aminoacylation	2	2.32558	0.0565979	EARS-2, YARS-2	76	9	11627	33.9971	0.997524	0.329727	47.8098
GOTERM_BP_DIRECT	GO:0006518	peptide metabolic process	2	2.32558	0.0565979	ZK550.3, Y67H2A.7	76	9	11627	33.9971	0.997524	0.329727	47.8098
GOTERM_CC_DIRECT	GO:0005622	intracellular	6	6.97674	0.0767738	MRPS-16, MRPL-17, MRPS-14, GFM-1, T14B4.2, MRPS-2	67	392	11373	2.59816	0.970245	0.273505	52.6378
GOTERM_MF_DIRECT	GO:0046933	proton-transporting ATP synthase activity, rotational mechanism	2	2.32558	0.071623	Y82E9BR.3, HPO-18	55	13	9479	26.5147	0.995596	0.66211	53.9628
